# Supplementary material for: Determination of Fe(iii) using digital images: study of corrosion in steel plates using a polyester laser printed device
Source: Royal Society of Chemistry journal article supplement (doi:10.1039/c6ay02590k), 2016-12-28
Supplement: c6ay02590k1.pdf [file c6ay02590k1.pdf]

## ESI

### Determination of Fe(III) using digital images: Study of corrosion in steel plates using a polyester laser printed devices

Juliano Passaretti Filho, Marco Antônio Gomes Valente Junior, Paulo Clairmont F. de Lima Gomes, Cecílio Sadao Fugivara, Arnaldo Alves Cardoso\*

São Paulo State University, Department of Analytical Chemistry, UNESP, CEP 14800-970, Araraquara, SP, Brazil

\*Corresponding author. E-mail: [acardoso@iq.unesp.br](mailto:acardoso@iq.unesp.br)

### Analysis of spot colors using chromaticity diagrams<sup>1</sup>

The relationship between the coordinates of the chromaticity diagram and the variables R, G, and B could be described using:

$$\begin{bmatrix} x \\ y \\ z \end{bmatrix} = M \begin{bmatrix} R \\ G \\ B \end{bmatrix} \quad (\text{Eq. 1})$$

where  $x$ ,  $y$ , and  $z$  are the values of the chromaticity coordinates,  $M$  is the proportionality matrix, which is dependent on the theoretical blank value and the illumination rate used, and  $R$ ,  $G$ , and  $B$  are values corresponding to the red, green, and blue components. In this way, it was possible to convert the variables  $R$ ,  $G$ , and  $B$  to coordinates  $x$ ,  $y$ , and  $z$  in the chromaticity diagram. In this work, the reference used was the CIE 1931 diagram, considering the coordinates of the diagram to be equidistant ( $x = y = z = 1$ ). This conversion procedure resulted in a set of linear equations (Eqs. 2-4).

$$x = \frac{0.490R + 0.310G + 0.200B}{0.667R + 1.132G + 1.200B} \quad (\text{Eq. 2})$$

$$y = \frac{0.117R + 0.812G + 0.010B}{0.667R + 1.132G + 1.200B} \quad (\text{Eq. 3})$$

$$z = \frac{0.000R + 0.010G + 0.990B}{0.667R + 1.132G + 1.200B} \quad (\text{Eq. 4})$$

Eqs. 2-5 were used to convert the values of the average vectors  $R$ ,  $G$ , and  $B$  of the image matrix into chromaticity coordinates  $x$ ,  $y$ , and  $z$ , resulting in a spatial position within the axes of the chromaticity diagram. This approach avoided the occurrence of any false positive concentrations produced by analytical signals for solutions with colors different to that expected, and also enabled the identification of outliers by the prior establishment of a calibration set using samples with known concentrations of  $\text{Fe}^{3+}$ .

Table 1. Figures of merit for the proposed methods using a cellphone and a scanner.

| Fe <sup>3+</sup> concentration range<br>(mmol L <sup>-1</sup> ) |             |       | y = a [Fe <sup>3+</sup> x 10 <sup>-3</sup> mmol L <sup>-1</sup> ] |          | Sum of squares | Residual sum of squares | N  | RSD Curve (%) |
|-----------------------------------------------------------------|-------------|-------|-------------------------------------------------------------------|----------|----------------|-------------------------|----|---------------|
|                                                                 |             |       |                                                                   | error(a) |                |                         |    |               |
| Cellphone                                                       | 0.12 - 1.26 | Gray  |                                                                   | 29       | 0.32           | 0.0103                  | 15 | 0.040         |
|                                                                 |             | Green |                                                                   | 13       | 0.25           | 0.0022                  | 15 | 0.021         |
|                                                                 |             | Blue  |                                                                   | 45       | 1.1            | 0.0253                  | 21 | 0.071         |
| Scanner                                                         | 0.12 - 1.26 | Gray  |                                                                   | 8.2      | 0.17           | 0.0008                  | 15 | 0.013         |
|                                                                 |             | Green |                                                                   | 7.3      | 0.25           | 0.0007                  | 15 | 0.012         |
|                                                                 |             | Blue  |                                                                   | 8.1      | 0.61           | 0.0008                  | 15 | 0.013         |

**Parameters for model validation**

|       | <i>Scanner</i> |         |           |         | <i>Cellphone</i> |         |           |         |
|-------|----------------|---------|-----------|---------|------------------|---------|-----------|---------|
|       | G              | B       | Grayscale | ED      | G                | B       | Grayscale | ED      |
| PRESS | 7.3E-09        | 3.7E-09 | 1.4E-08   | 2.4E-08 | 4.0E-08          | 4.6E-08 | 6.2E-08   | 1.5E-08 |
| RMSEP | 2.2E-05        | 1.6E-05 | 3.1E-05   | 4.0E-05 | 6.7E-05          | 7.2E-05 | 8.3E-05   | 3.2E-05 |
| MSEC  | 4.9E-10        | 2.5E-10 | 9.4E-10   | 1.6E-09 | 4.4E-09          | 5.1E-09 | 6.8E-09   | 1.0E-09 |

Table 2. Relative errors, comparing the image analysis methods with the reference gravimetric method.

| Cell phone |                   |           |                  |           |              |           |             |           |           |           |                    |       |      |      |
|------------|-------------------|-----------|------------------|-----------|--------------|-----------|-------------|-----------|-----------|-----------|--------------------|-------|------|------|
| Time (h)   | Fe (g) Gravimetry |           | Fe (g) GrayScale |           | Fe (g) Green |           | Fe (g) Blue |           | Fe (g) ED |           | Relative error (%) |       |      |      |
|            | Mean              | Std. dev. | Mean             | Std. dev. | Mean         | Std. dev. | Mean        | Std. dev. | Mean      | Std. dev. | Grey               | Green | Blue | ED   |
| 1.5        | 0.0150            | 0.0008    | 0.0165           | 0.0062    | 0.0159       | 0.0020    | 0.0183      | 0.0075    | 0.0157    | 0.0017    | 9.50               | 5.70  | 21.6 | 4.10 |
| 3          | 0.0305            | 0.0018    | 0.0226           | 0.0040    | 0.0373       | 0.0039    | 0.0326      | 0.0028    | 0.0409    | 0.0049    | 25.9               | 22.5  | 7.00 | 34.1 |
| 6          | 0.0502            | 0.0067    | 0.0329           | 0.0214    | 0.0615       | 0.0076    | 0.0450      | 0.0177    | 0.0654    | 0.0086    | 34.3               | 22.5  | 10.3 | 30.4 |
| 9          | 0.0714            | 0.0153    | 0.0444           | 0.0057    | 0.0800       | 0.0095    | 0.0701      | 0.0024    | 0.0859    | 0.0106    | 37.8               | 12.0  | 1.90 | 20.3 |
| 12         | 0.0939            | 0.0012    | 0.0937           | 0.0155    | 0.1141       | 0.0095    | 0.1092      | 0.0024    | 0.1115    | 0.0113    | 0.200              | 21.6  | 16.3 | 18.8 |
| 15         | 0.1080            | 0.0016    | 0.0983           | 0.0095    | 0.0972       | 0.0207    | 0.1185      | 0.0060    | 0.0855    | 0.0117    | 9.0                | 10.1  | 9.70 | 20.9 |
| 18         | 0.1271            | 0.0047    | 0.1457           | 0.0028    | 0.1112       | 0.0101    | 0.1361      | 0.0047    | 0.1356    | 0.0124    | 14.6               | 12.5  | 7.00 | 6.60 |
| 21         | 0.1398            | 0.0063    | 0.1416           | 0.0058    | 0.1045       | 0.0078    | 0.1362      | 0.0046    | 0.1294    | 0.0120    | 1.30               | 25.3  | 2.60 | 7.50 |

  

| Scanner  |                   |           |                  |           |              |           |             |           |           |           |                    |       |      |      |
|----------|-------------------|-----------|------------------|-----------|--------------|-----------|-------------|-----------|-----------|-----------|--------------------|-------|------|------|
| Time (h) | Fe (g) Gravimetry |           | Fe (g) GrayScale |           | Fe (g) Green |           | Fe (g) Blue |           | Fe (g) ED |           | Relative error (%) |       |      |      |
|          | Mean              | Std. dev. | Mean             | Std. dev. | Mean         | Std. dev. | Mean        | Std. dev. | Mean      | Std. dev. | Grey               | Green | Blue | ED   |
| 1.5      | 0.0150            | 0.0008    | 0.0169           | 0.0008    | 0.0159       | 0.0020    | 0.0156      | 0.0005    | 0.0181    | 0.0022    | 12.3               | 5.70  | 3.80 | 20.4 |
| 3        | 0.0305            | 0.0018    | 0.0399           | 0.0016    | 0.0373       | 0.0039    | 0.0374      | 0.0011    | 0.0424    | 0.0052    | 31.1               | 22.5  | 22.6 | 39.3 |
| 6        | 0.0502            | 0.0067    | 0.0664           | 0.0042    | 0.0615       | 0.0076    | 0.0621      | 0.0039    | 0.0711    | 0.0099    | 32.3               | 22.5  | 23.9 | 41.7 |
| 9        | 0.0714            | 0.0153    | 0.0839           | 0.0055    | 0.0800       | 0.0095    | 0.0790      | 0.0045    | 0.0889    | 0.0112    | 17.5               | 12.0  | 10.6 | 24.5 |
| 12       | 0.0939            | 0.0012    | 0.0988           | 0.0025    | 0.1141       | 0.0095    | 0.0984      | 0.0045    | 0.0972    | 0.0115    | 5.30               | 21.6  | 4.80 | 3.50 |
| 15       | 0.1080            | 0.0016    | 0.0879           | 0.0018    | 0.0972       | 0.0207    | 0.0972      | 0.0019    | 0.0784    | 0.0106    | 18.6               | 10.1  | 10.1 | 27.5 |
| 18       | 0.1271            | 0.0047    | 0.1350           | 0.0039    | 0.1112       | 0.0101    | 0.1249      | 0.0026    | 0.1447    | 0.0112    | 6.20               | 12.5  | 1.80 | 13.9 |
| 21       | 0.1398            | 0.0063    | 0.1597           | 0.0032    | 0.1045       | 0.0078    | 0.1494      | 0.0021    | 0.1698    | 0.0105    | 14.2               | 25.3  | 6.90 | 21.4 |

## References

- 1 J. Passaretti Filho, J. F. da Silveira Petrucci and A. Alves Cardoso, *Talanta*, 2015, **140**, 73–80.
